# Supplementary material for: Economic, energy and carbon footprint assessment of integrated forward osmosis membrane bioreactor (FOMBR) process in urban wastewater treatment
Source: Royal Society of Chemistry journal article supplement (doi:10.1039/c9ew00608g), 2019-11-19
Supplement: c9ew00608g3.pdf [file c9ew00608g3.pdf]

1 **Economic, energy and carbon footprint assessment of integrated forward**  
2 **osmosis membrane bioreactor (FOMBR) process in urban wastewater**  
3 **treatment**

4  
5 For submission to

6  
7 **Environmental Science: Water Research & Technology**

8  
9  
10 **Supplementary information**  
11  
12

13 Nur Hafizah Ab Hamid<sup>1</sup>, Simon Smart<sup>1</sup>, David K. Wang<sup>2</sup>, Kaniel Koh Wei Jun<sup>1,3</sup>, Calvin Ng  
14 Jiak Chern<sup>1,3</sup>, Liu Ye<sup>1\*</sup>

15  
16 <sup>1</sup>School of Chemical Engineering, The University of Queensland, St Lucia, Brisbane, QLD  
17 4072, Australia;

18 <sup>2</sup>School of Chemical and Biomolecular Engineering, The University of Sydney, Sydney, NSW  
19 2006 Australia;

20 <sup>3</sup>Ngee Ann Polytechnic, 599489, Singapore;

21  
22 \*Corresponding author: phone + 61 7 3365 4152; fax +61 7 3365 4199; email:

23 [l.ye@uq.edu.au](mailto:l.ye@uq.edu.au)  
24  
25

26 Summary: There are seven pages in the supporting information section (4 tables and 1 graph)

27 **Appendix A: Mass balance, CAPEX and OPEX parameters and assumptions**

28 **Table A1.** Characteristics of the influent wastewater

| Parameters of the wastewater influent     | Symbol              | Values | Unit                   |
|-------------------------------------------|---------------------|--------|------------------------|
| Influent flow rate                        | $Q_{Inf}$           | 15 000 | $m^3 \text{ day}^{-1}$ |
| Biosolids concentration in influent       | $X_{S,Inf}$         | 100    | $\text{mg-COD L}^{-1}$ |
| COD concentration in influent             | $S_{COD,Inf}$       | 400    | $\text{mg-COD L}^{-1}$ |
| $\text{NH}_4^+$ concentration in influent | $S_{\text{NH},Inf}$ | 50     | $\text{mg-N L}^{-1}$   |
| $\text{NO}_3^-$ concentration in influent | $S_{\text{NO},Inf}$ | 0      | $\text{mg-N L}^{-1}$   |

29

30 Other assumptions implemented for the mass balance calculations:

31 i. All of the units were operated with the steady-flow, therefore, there was no  
32 accumulation within the system.

33 ii. The density of the wastewater was assumed to be constant at  $1000 \text{ kg m}^{-3}$  (The  
34 contaminants in the influent were too small to be compared with the volume of  
35 wastewater to cause a significant change in the density).

36 iii. Constant influent characteristics, component conversion in the bioreactor, digester and  
37 AMOX reactor. Constant solid destruction in digester over variation of sludge age,  
38 stoichiometric ratio, kinetics and temperature of the process (Table A2, supplementary  
39 information).

40 iv. The fouling formation, propensity and characteristics were assumed to be constant,  
41 hence, the chemical cleaning frequency was expected to be consistent. However, it was  
42 expected the fouling on FO membrane was relatively loose and low in propensity, and  
43 therefore, FO required fewer cleaning regimes compared to MF and RO membranes.  
44 Intense chemical cleaning, using 3500 ppm sodium hypochlorite (NaOCl) and 2500  
45 ppm citric acid, was conducted 4 times per year for MF and RO, but only twice per year  
46 for the FO.

47 v. The flow of the recycle stream from the sludge handling units to the bioreactors were  
48 assumed to be insignificant to affect the characteristics of the influent wastewater.

50 **Table A2.** Parameters of the mass balance calculations

| Scenario                          | Unit                | Operation Conditions/ Assumptions                                                                                                                                                                                                                                                                                                                                                                                                                |
|-----------------------------------|---------------------|--------------------------------------------------------------------------------------------------------------------------------------------------------------------------------------------------------------------------------------------------------------------------------------------------------------------------------------------------------------------------------------------------------------------------------------------------|
| All scenarios                     | Primary Treatment   | <b>Primary Settler</b><br>All COD solids is removed and transported to digestion (sludge treatment) at 1%                                                                                                                                                                                                                                                                                                                                        |
|                                   | Sludge treatment    | <b>Thickener</b><br>Biosolids dewatered to a concentration of 5%                                                                                                                                                                                                                                                                                                                                                                                 |
|                                   |                     | <b>Anaerobic digester</b><br>Retention time in digester: 16 days<br>Conversion to electricity: 40%<br>Temperature of vessel: 40%<br>Safety margin 1%                                                                                                                                                                                                                                                                                             |
|                                   |                     | <b>Belt press</b><br>Biosolids dewatered to a concentration of 15%                                                                                                                                                                                                                                                                                                                                                                               |
| A and B                           | MFAeMBR and FOAeMBR | <b>MBR</b><br>COD conversion: 0.99<br>NH <sub>4</sub> <sup>+</sup> conversion: 0.99<br>NO <sub>3</sub> <sup>-</sup> conversion 0.7 - 0.99<br>Biomass retention time: 30 days<br>Autotrophs decay rate: 0.1 per day<br>Heterotrophs decay rate: 0.2 per day<br>Autotrophs yield rate: 0.24 g cell COD formed/ g NH <sub>4</sub> <sup>+</sup> -N oxidized<br>Heterotrophs yield rate: 0.67 g cell COD formed/ g COD removed (oxidized+assimilated) |
| All scenarios with MF application | MFAeMBR and MFAnMBR | <b>MF unit</b><br>Water flux recovery: 95%<br>Rejection performance: COD = 50%<br>Intense chemical cleaning: 4 times per year<br>Concentration of chemicals used for cleaning: 3500 ppm NaOCl, 2500 ppm citric acid                                                                                                                                                                                                                              |
| Scenario B: MFAeMBR-RO            | RO                  | <b>RO unit</b><br>Water flux recovery: 75%<br>Rejection performance: COD = 100%, NH <sub>4</sub> = 98%; NO <sub>3</sub> <sup>-</sup> = 95%<br>Intense chemical cleaning: 4 times per year<br>Concentration of chemicals used for cleaning: 3500 ppm NaOCl, 2500 ppm citric acid                                                                                                                                                                  |
| All scenarios with FO application | FOAeMBR and FOAnMBR | <b>FO unit</b><br>Water flux recovery: 80%<br>Rejection performance: COD = 99%, NH <sub>4</sub> <sup>+</sup> = 93%; NO <sub>3</sub> <sup>-</sup> = 85% (experimental results)<br>Intense chemical cleaning: 2 times per year<br>Concentration of chemicals used for cleaning: 3500 ppm NaOCl, 2500 ppm citric acid                                                                                                                               |
| Scenario B: FOAeMBR-RO            | RO                  | <b>RO unit</b><br>Water flux recovery: 50%<br>Rejection performance: COD = 100%, NH <sub>4</sub> <sup>+</sup> = 98%; NO <sub>3</sub> <sup>-</sup> = 95%                                                                                                                                                                                                                                                                                          |

|            |                     |                                                                                                                                                                                                                                                                                                                                                            |
|------------|---------------------|------------------------------------------------------------------------------------------------------------------------------------------------------------------------------------------------------------------------------------------------------------------------------------------------------------------------------------------------------------|
|            |                     | Intense chemical cleaning: 4 times per year<br>Concentration of chemicals used for cleaning: 3500 ppm NaOCl, 2500 ppm citric acid                                                                                                                                                                                                                          |
|            |                     | <b>AnMBR</b><br><i>Remarks: Due to the complexity of the anaerobic reactions; it has been simplified to acidogenesis and methanogenesis. The COD in the wastewater is assumed to be fully degradable.</i>                                                                                                                                                  |
| Scenario C | MFAnMBR and FOAnMBR | Conversion by acidogenesis: 1<br>Conversion by methanogenesis: 0.99<br>Biomass retention time: 40 days<br>Acidogenesis decay rate: 0.02 per day<br>Methanogenesis decay rate: 0.036 per day<br>Acidogenesis yield rate: 0.07 g COD formed/ g COD removed<br>Methanogenesis 0.076 g COD formed/ g COD removed                                               |
|            |                     | <b>PN/Anammox</b><br>Conversion by autotrophs: 0.57<br>Conversion by anammox (MF): 0.26<br>Conversion by anammox (FO): 0.40<br><br>Biomass retention time: Indefinite<br>Autotrophs decay rate: 0.2 per day<br>Anammox decay rate: 0.00384 per day<br>Autotrophs yield rate: 0.24 g COD formed/ g COD removed<br>Anammox 0.164 g COD formed/ g COD removed |

51

52 Other assumptions implemented for CAPEX and OPEX calculations:

53 i. Other values or costs provided in \$USD by the suppliers were converted by assuming  
54 constant exchange rate of \$USD 1.00 = \$AUD 1.33.

55ii. The detailed calculation of the pump installation (except for the membrane units; MF, FO  
56 and RO) in the wastewater treatment plants were not considered, therefore, a higher  
57 contingency value (50%) was applied to cover for the pump installation and operation.

58ii. The cost of the gas purging in the anaerobic membrane bioreactor (AnMBR) was not  
59 significant to be compared to the other OPEX (e.g. aeration and mixing) hence, purging  
60 cost was not included in the calculations.

- 61iv. The energy consumed for the anaerobic digester unit included the energy required for  
 62 stirring and pre-heating of the influent.
- 63v. Membrane cost was assumed to be constant throughout the operation. The installation and  
 64 membrane replacement costs are as shown in Table 3 in the main manuscript.
- 65vi. The earnings of the wastewater treatment plant depending on the quality of the effluent or  
 66 product water produced (Table A3, supplementary information).

67  
 68 **Table A3.** Specific earnings of wastewater treatment

| <b>Earnings</b>                   |                                     | <b>Values</b> | <b>Unit</b>                            |
|-----------------------------------|-------------------------------------|---------------|----------------------------------------|
| Biological<br>treatment           | Carbon-based compounds<br>removal   | 5             | \$/ kg-chemical oxygen<br>demand (COD) |
|                                   | Nitrogen-based compounds<br>removal | 15            | \$/kg-N                                |
| Electricity produced from methane |                                     | 0.12          | \$/kWh                                 |
| Water sale                        |                                     | 1.70          | \$/m <sup>3</sup>                      |

69

70 **Appendix B: Sensitivity analysis – carbon footprint**

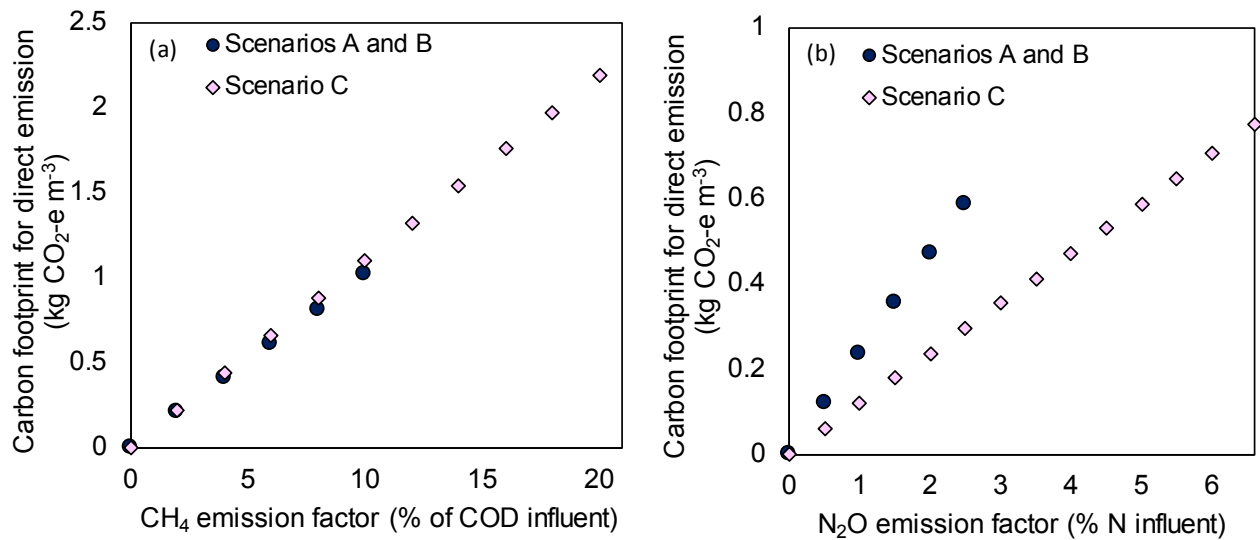

71  
 72 **Fig. B1:** Sensitivity analysis of carbon footprint for direct emission due to the variation of  
 73 GHG emit/mass influent ratio (a) CH<sub>4</sub> emission factor in scenarios A, B and C; (b) N<sub>2</sub>O  
 74 emission factor in scenarios A, B and C  
 75

76 Based on 2006 IPCC Guidelines for National Greenhouse Gas Inventories<sup>1</sup>, the CH<sub>4</sub> emission  
 77 factor ( $B_o \times MCF$ ) may vary from 5 – 10% and 5 – 20% of COD influent for aerobic-anoxic  
 78 and anaerobic+PN/AMOX operations respectively under a sub-optimal operation. As for N<sub>2</sub>O  
 79 emissions, a review done by Law (2012) shows that the aerobic-anoxic may vary from from  
 80 0.035 – 2.59 % of N-influent for aerobic-anoxic process and 0.4 – 6.6 % of N-influent for  
 81 anaerobic+PN/AMOX process.<sup>2</sup>

82

83

84 **Appendix C: Reverse salt diffusion baseline calculation**

85 **Table C1.** Methodologies of reverse salt diffusion in FOMBR operation

86

| Parameters                                                  | Equation/ Justification                                                    | Value | Unit                                       |
|-------------------------------------------------------------|----------------------------------------------------------------------------|-------|--------------------------------------------|
| Volume of MBR ( $V_{\text{MBR}}$ )                          | $\frac{\text{Mass biosolid in bioreactor}}{\text{Biosolid concentration}}$ | 896   | $\text{m}^3$                               |
| Maximum salt concentration in MBR ( $C_{\text{salt-max}}$ ) | Assumption                                                                 | 3     | $\text{kg NaCl m}^{-3}$                    |
| Reverse salt flux ( $\text{RSD}_{\text{flux}}$ )            | Assumption                                                                 | 0.01  | $\text{kg m}^{-2}\cdot\text{hour}^{-1}$    |
| Area of MF required ( $A_{\text{MF}}$ )                     | -                                                                          | 2776  | $\text{m}^2$                               |
| Rate of salt diffuse ( $\text{RSD}_{\text{rate}}$ )         | $\text{RSD}_{\text{flux}} \times A_{\text{MF}}$                            | 416   | $\text{kg hour}^{-1}$                      |
| MF water flux ( $\text{MF}_{\text{flux}}$ )                 | Assume the MF is operated at 2 bar                                         | 0.05  | $\text{m}^3 \text{m}^{-2}\text{hour}^{-1}$ |

87

88 The CAPEX and OPEX of MF in controlling salinity in FOMBR were referred to Choi's work  
 89 (2015)<sup>3</sup>. The CAPEX of MF installation was \$119 944 meanwhile the CAPEX for the FO  
 90 operation was \$31 504 year<sup>-1</sup>. These values were equivalent to 5 % and 7 % of FO CAPEX  
 91 cost and FO OPEX in scenario A respectively.

92

93

94 **References:**

- 95 1 M. R. J. Doorn, S. Towprayoon, S. M. Manso Vieira, W. Irving, C. Palmer, R. Pipatti  
96 and C. Wang, Wastewater Treatment and Discharge, *2006 IPCC Guidel. Natl. Greenh.*  
97 *Gas Invent.*, 2006, 1–28.
- 98 2 Y. Law, L. Ye, Y. Pan and Z. Yuan, Nitrous oxide emissions from wastewater  
99 treatment processes, *Philos. Trans. R. Soc. B Biol. Sci.*, 2012, **367**, 1265–1277.
- 100 3 Y. Choi, H. Cho, Y. Shin, Y. Jang and S. Lee, Economic evaluation of a hybrid  
101 desalination system combining forward and reverse osmosis, *Membranes (Basel)*.,  
102 2015, **6**, 1–19.
- 103
