# Supplementary figures and images for: Economic, energy and carbon footprint assessment of integrated forward osmosis membrane bioreactor (FOMBR) process in urban wastewater treatment
Source: Royal Society of Chemistry journal article supplement (doi:10.1039/c9ew00608g), 2019-11-19

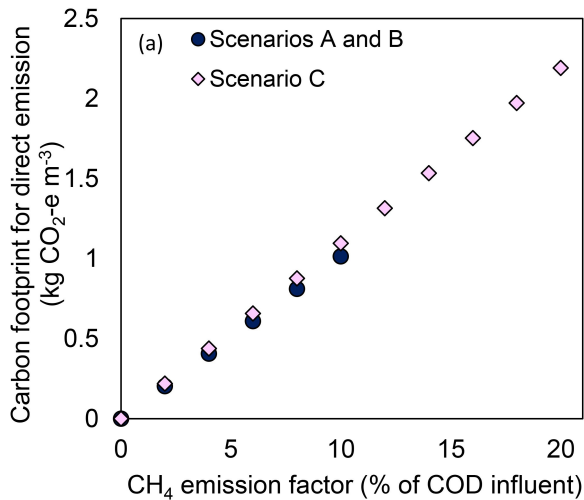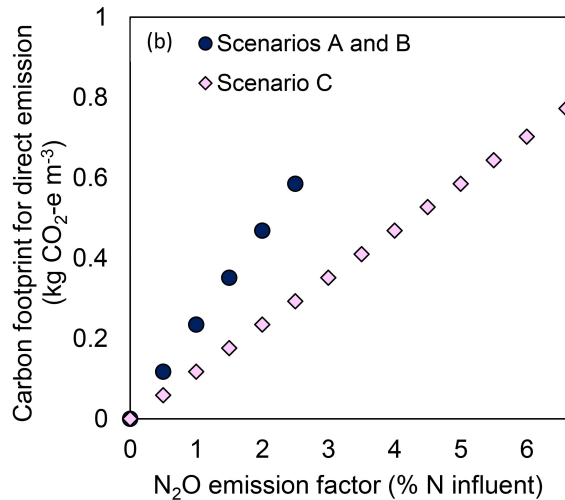

Supplement: c9ew00608g2.pdf [file c9ew00608g2.pdf]
